# Supplementary material
Source: PubMed Central journal article supplement (PMC3978111)
Supplement: NIHMS556301-supplement-FJE_Schematic_Diagram.pdf [file NIHMS556301-supplement-FJE_Schematic_Diagram.pdf]

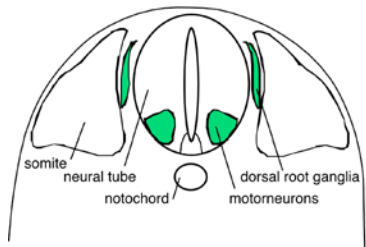

Normal Isl-1 Expression

Transgenesis  
? Diabetic Pregnancy

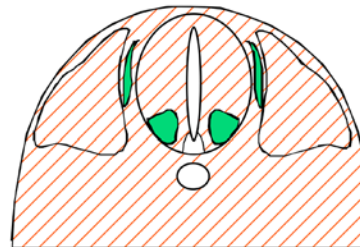

Deregulated Isl-1 Expression

Growth Inhibition  
Increased Apoptosis

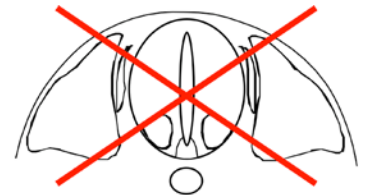

Caudal region absent or shortened

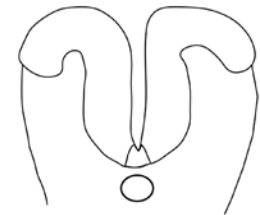

Spina bifida with reduced mesoderm
