# Supplementary material
Source: PubMed Central journal article supplement (PMC3978111)

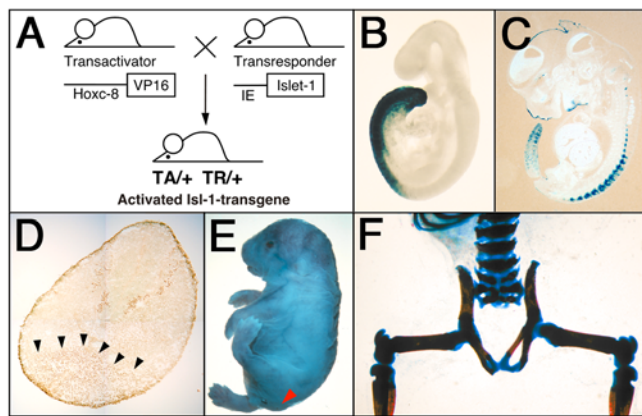

Supplement: NIHMS556301-supplement-FJE_Figure_1.pdf [file NIHMS556301-supplement-FJE_Figure_1.pdf]

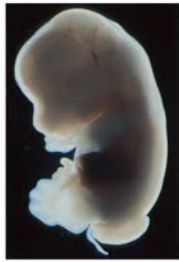

**A**

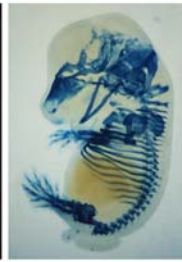

**B**

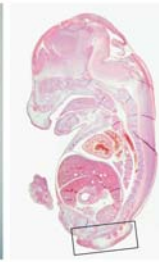

**C**

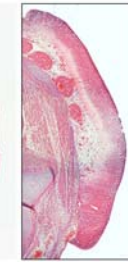

**D**

Supplement: NIHMS556301-supplement-FJE_Figure_2.pdf [file NIHMS556301-supplement-FJE_Figure_2.pdf]
